# Supplementary material for: The Arabidopsis effector-triggered immunity landscape is conserved in oilseed crops
Source: PubMed Central journal article supplement (PMC9021255; doi:10.1038/s41598-022-10410-w), 2022-04-20
Supplement: 41598_2022_10410_MOESM1_ESM.pdf [file 41598_2022_10410_MOESM1_ESM.pdf]

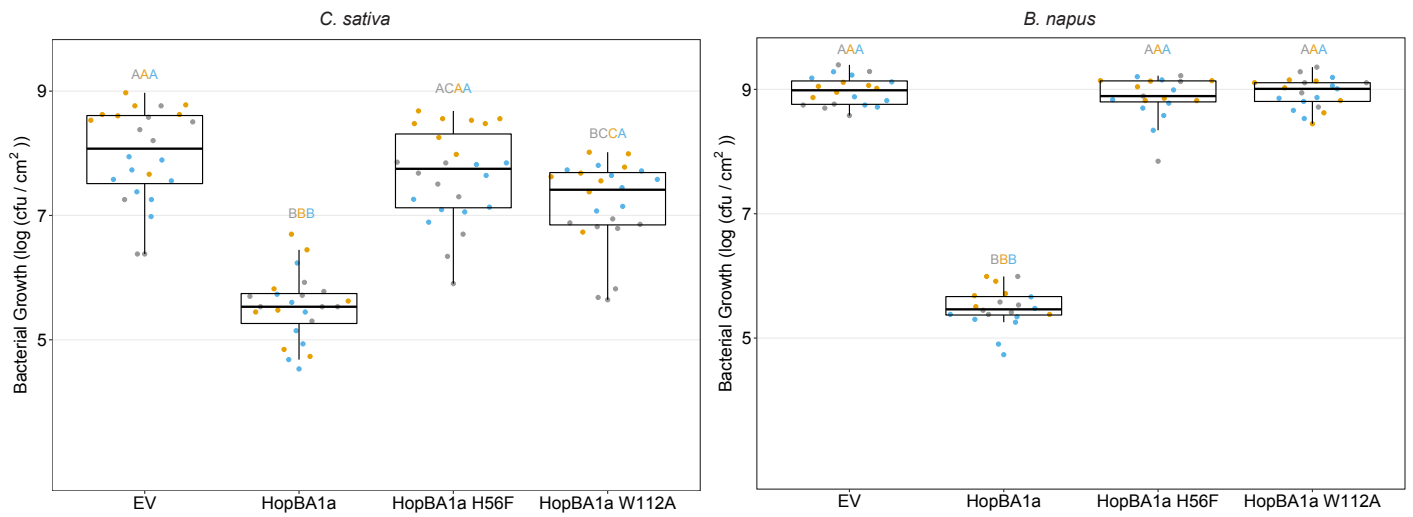

**Supplemental Figure 1.** HopBA1a elicits ETI in *B. napus* var. Topas and *C. sativa* var. DH55. Bacterial growth assays on *B. napus* and *C. sativa* infected with *Pto*DC3000 expressing an EV, HopBA1a, HopBA1a H56F, or HopBA1a W112A. Plants were spray inoculated with bacterial strains at an  $OD_{600} = 1$  and growth assays were performed 3 days post-infection. Boxes show the first quartile, median, and third quartile. Whiskers extend to the smallest, and largest values no further than 1.5x interquartile range from the first and third quartiles, respectively. Dots indicate individual plants, and different colours represent single experiments (n = 5, 6, 7, or 8 plants / experiment). Letters indicate significance categories (ANOVA with post-hoc Tukey-Kramer HSD test, P < 0.01).

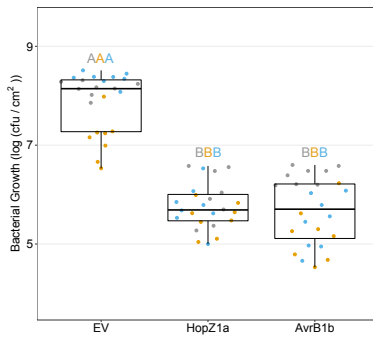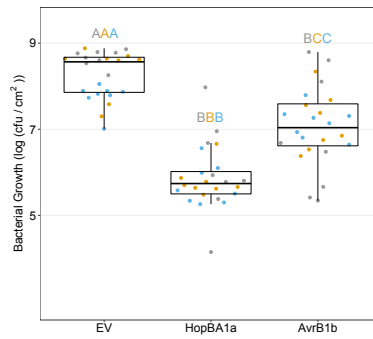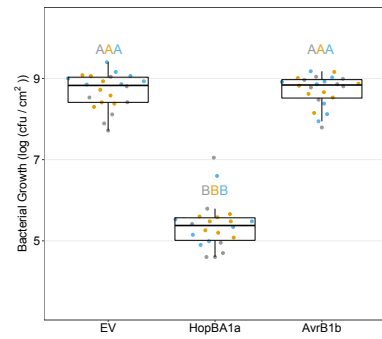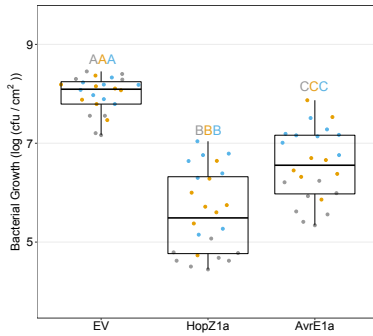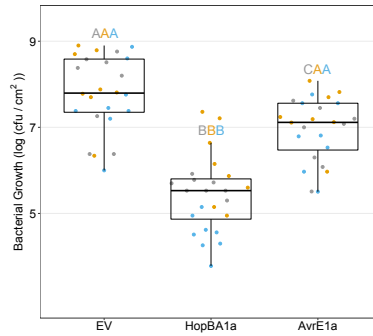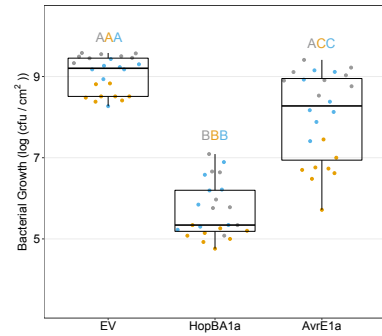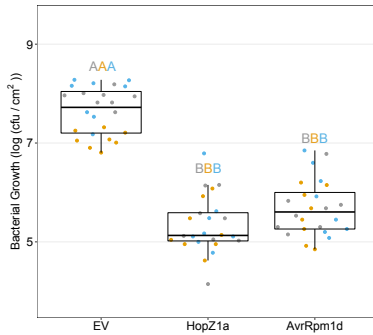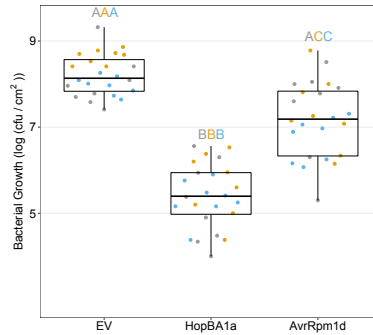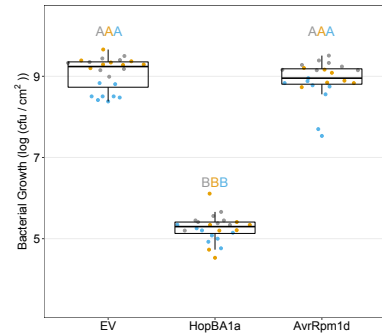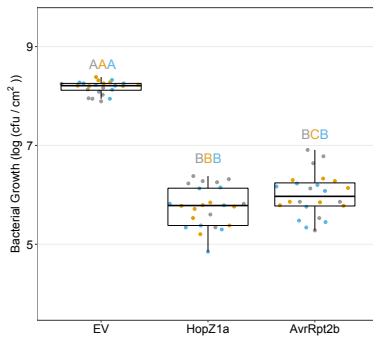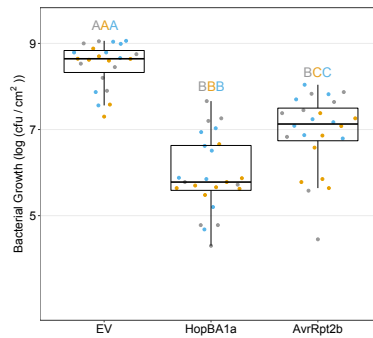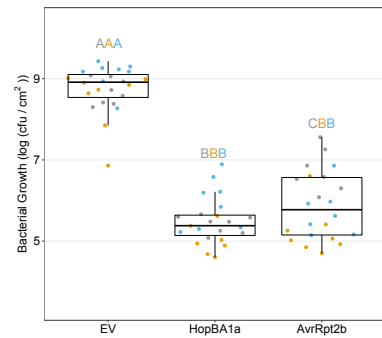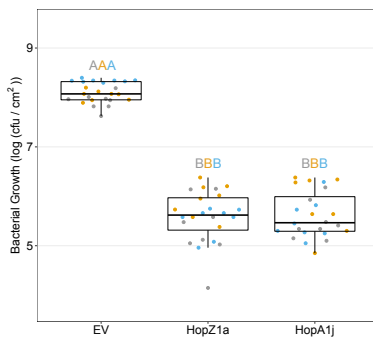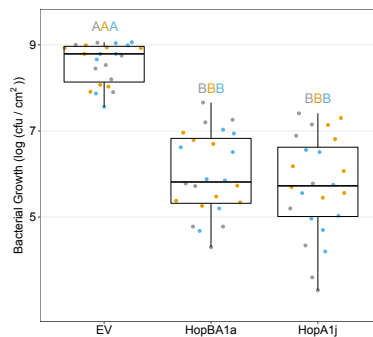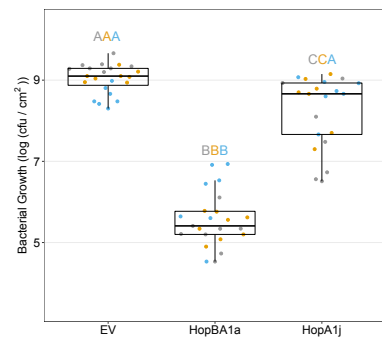



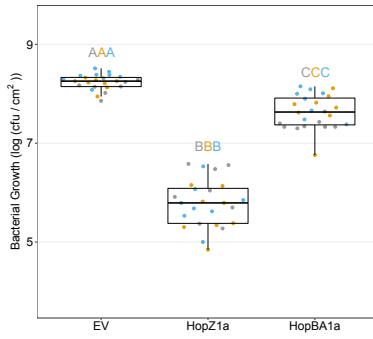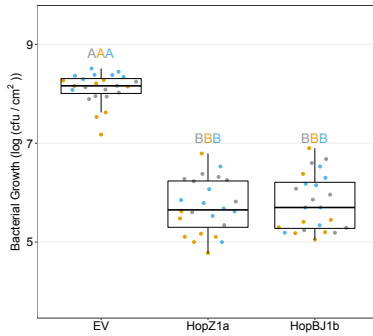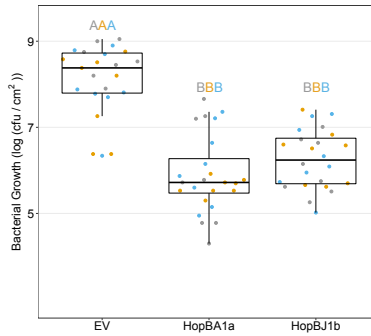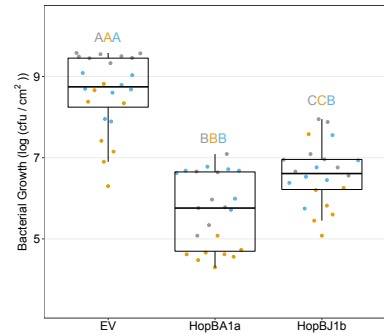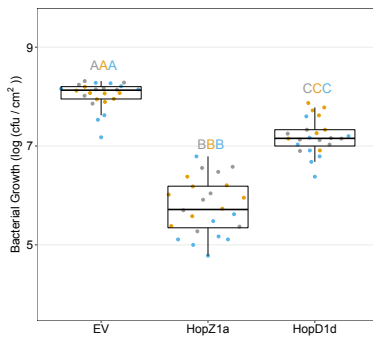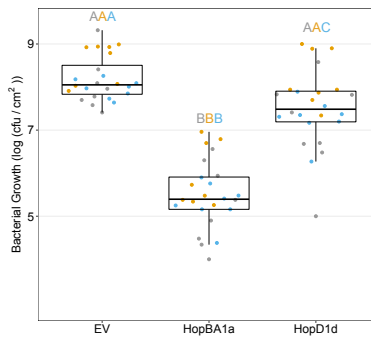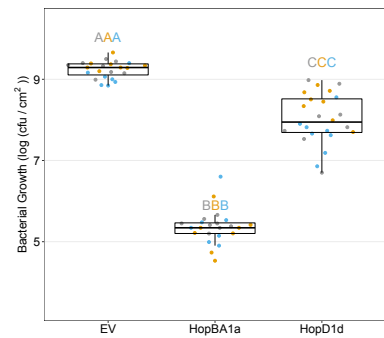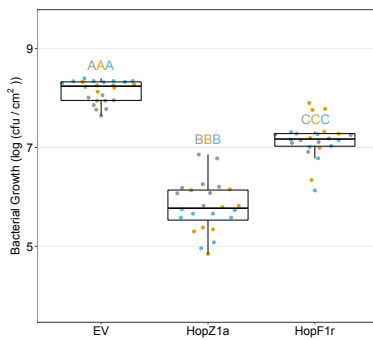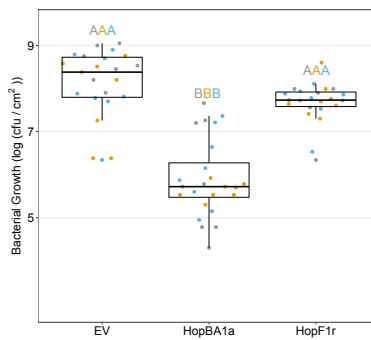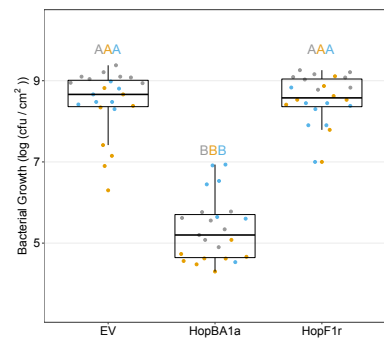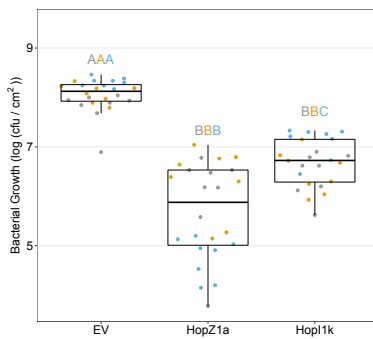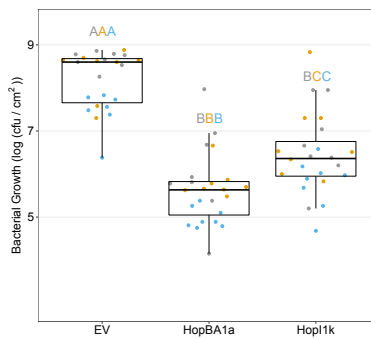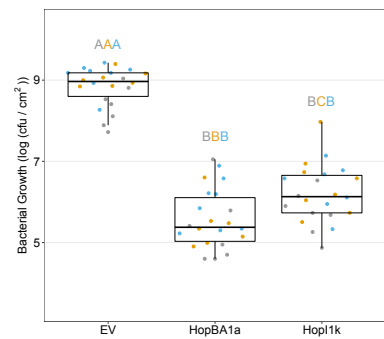

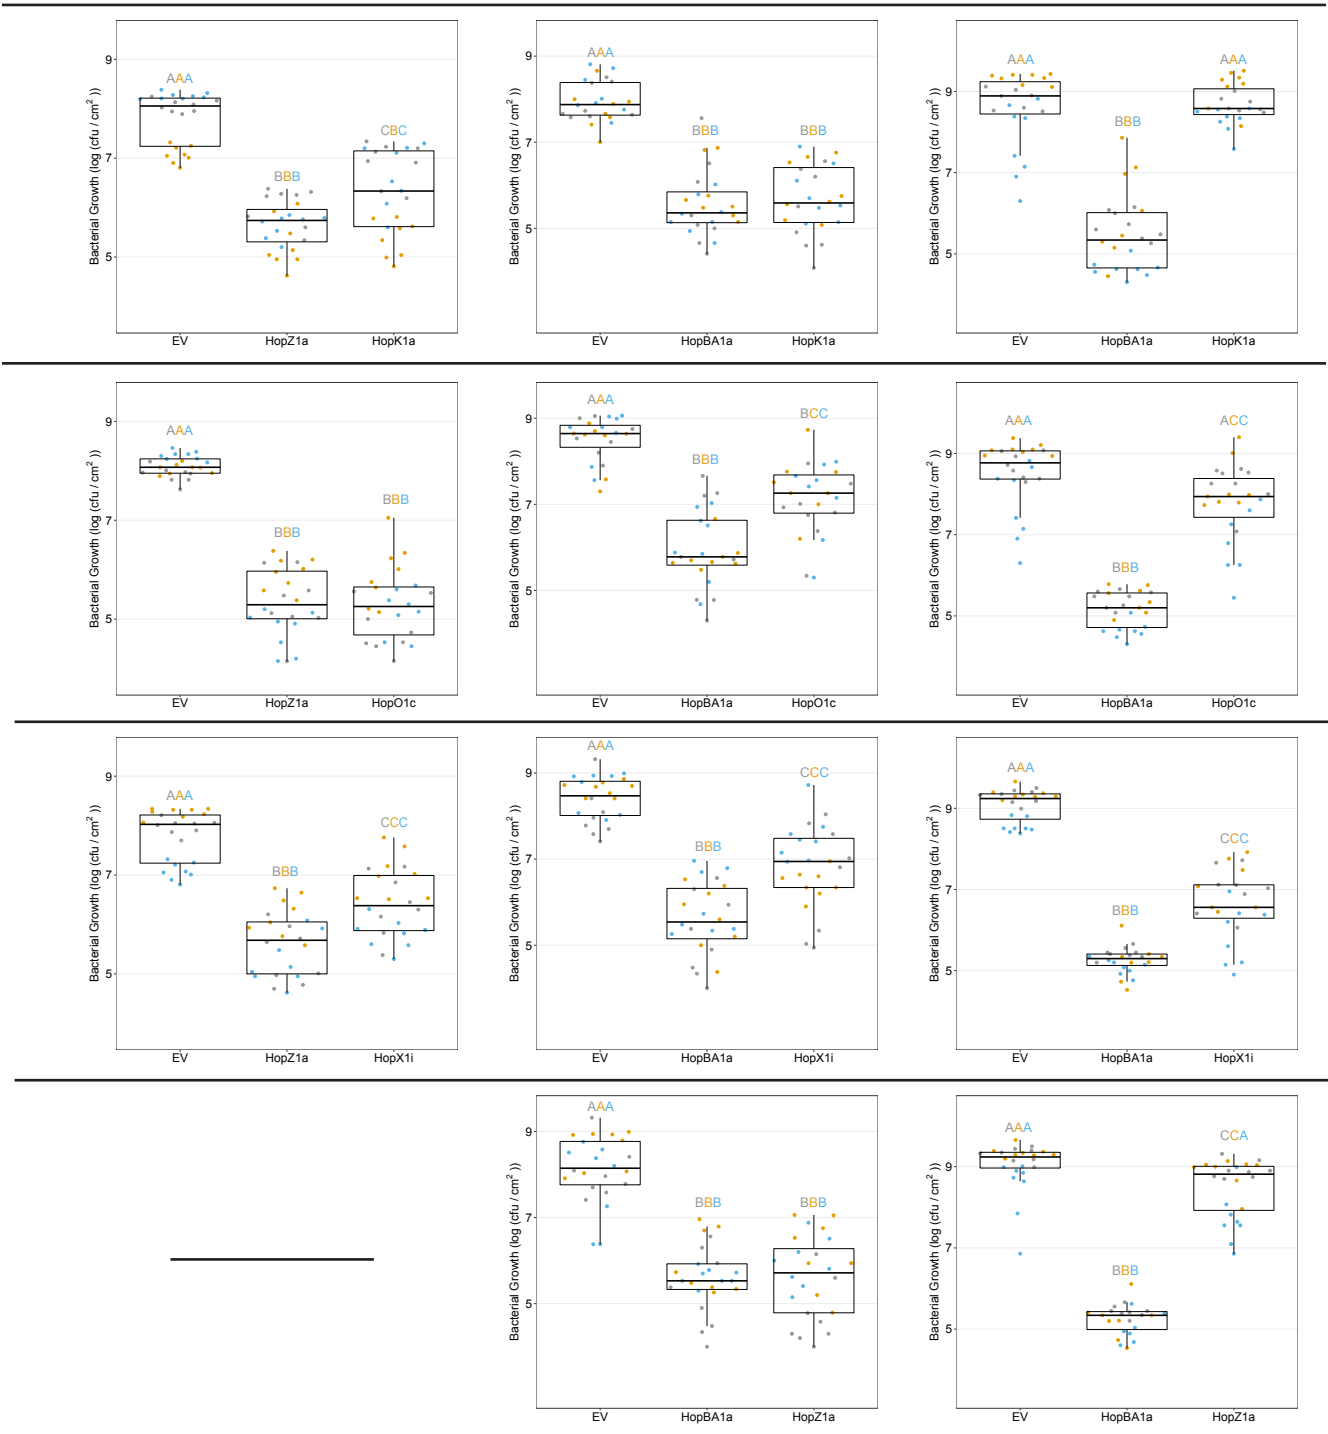

**Supplemental Figure 2.** Individual growth assay experimental replicates of *PtoDC3000* strains expressing 19 representative ETI eliciting effectors in *A. thaliana* Col-0, *C. sativa* var. DH55, and *B. napus* var. Topas alongside a negative empty vector control (EV), and a positive control (HopZ1a in *A. thaliana*, HopBA1a in *B. napus* and *C. sativa*). *A. thaliana* data is from Laflamme et al., 2020. One out of three replicates of HopAZ1s on *A. thaliana* was not significantly different than EV. Boxes show the first quartile, median, and third quartile. Whiskers extend to the smallest, and largest values no further than 1.5x interquartile range from the first and third quartiles, respectively. Dots indicate individual plants, and different colours represent single experiments (n = 6, 7, or 8 plants / experiment). Letters indicate significance categories (ANOVA with post-hoc Tukey-Kramer HSD test, P < 0.05).

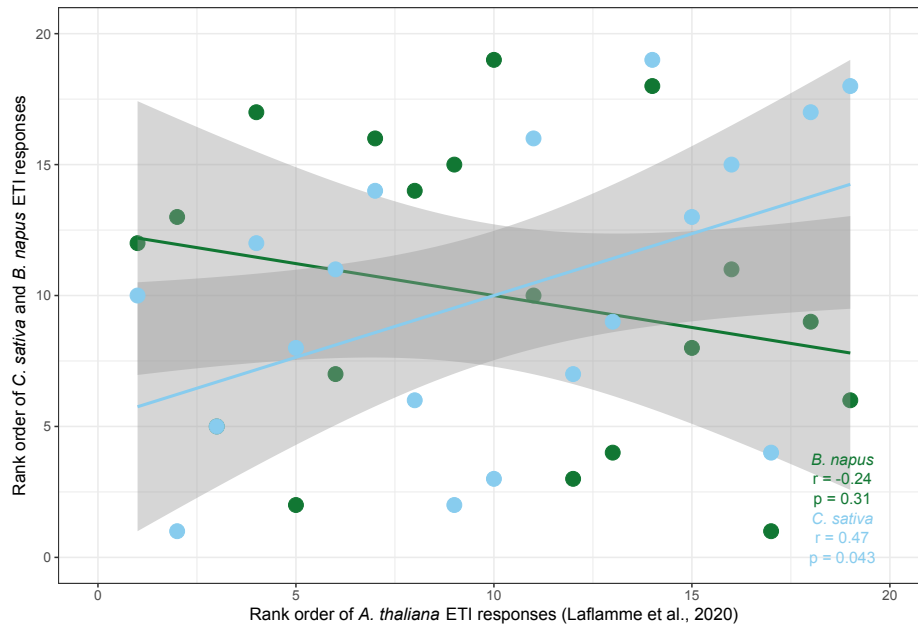

**Supplemental Figure 3.** Differential rank order of ETI eliciting effectors between *A. thaliana*, *B. napus*, and *C. sativa*. The rank orders of ETI responses in *B. napus* and *C. sativa* are plotted against the rank order of *A. thaliana* ETI responses (Laflamme et al., 2020) using the bacterial growth assay data presented in Figure 2, with 1 being the strongest (largest reduction in bacterial growth), and 19 being the weakest (smallest reduction in bacterial growth). Dots represent individual effectors. Blue represents *C. sativa* and green represents *B. napus*. The blue and green lines represent the linear regression models for *C. sativa* and *B. napus* data, respectively. The shaded grey areas represent the 95% confidence interval for the linear models. Spearman correlation coefficients are reported alongside the linear models and colour coded based on plant species.
